# Supplementary material for: Construction of a novel fluorescent DNA aptasensor for the fast-response and sensitive detection of copper ions in industrial sewage
Source: Royal Society of Chemistry journal article supplement (doi:10.1039/d3ay00699a), 2023-01-01
Supplement: d3ay00699a1.pdf [file d3ay00699a1.pdf]

## Supporting Information

### **Construction of a novel fluorescent DNA aptasensor for the fast-response and sensitive detection of copper ions in industrial sewage**

Yue Mou<sup>a</sup>, Yanfei Zhang<sup>a</sup>, Xinru Lin<sup>a</sup>, Meiyun Chen<sup>a</sup>, Yuxiang Xia<sup>a</sup>, Shu Zhu<sup>a</sup>, Chonghui Wei<sup>a</sup>, Xingyu Luo<sup>a\*</sup>

<sup>a</sup>School of Chemistry and Chemical Engineering, Guangxi University, Nanning 530004, P.R. China

\*E-mail address: jamesluoxingyu@163.com (Xingyu Luo)

---

# Content

|                                                 |           |
|-------------------------------------------------|-----------|
| <b>1. Synthesis and Characterization.....</b>   | <b>3</b>  |
| <b>Figure S1.....</b>                           | <b>4</b>  |
| <b>2. Supplemental Tables and Figures .....</b> | <b>5</b>  |
| <b>Table S1 .....</b>                           | <b>5</b>  |
| <b>Table S2 .....</b>                           | <b>5</b>  |
| <b>Table S3 .....</b>                           | <b>6</b>  |
| <b>Table S4 .....</b>                           | <b>7</b>  |
| <b>Table S5 .....</b>                           | <b>8</b>  |
| <b>Figure S2.....</b>                           | <b>8</b>  |
| <b>Figure S3.....</b>                           | <b>9</b>  |
| <b>Figure S4.....</b>                           | <b>9</b>  |
| <b>Figure S5.....</b>                           | <b>10</b> |
| <b>Figure S6.....</b>                           | <b>10</b> |
| <b>Figure S7.....</b>                           | <b>11</b> |
| <b>Figure S8.....</b>                           | <b>11</b> |
| <b>3. References.....</b>                       | <b>12</b> |

---

## 1. Synthesis and Characterization

### 1.1 Synthesis of (Z)-2, 6-difluoro-4-((2-methyl-5-oxooxazol-4(5H)-ylidene) methyl) phenyl acetate(1)<sup>[1]</sup>

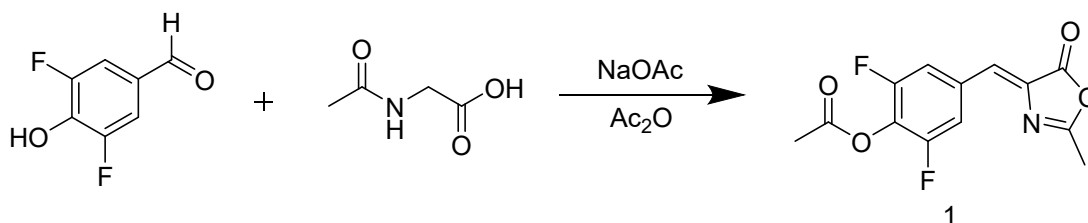

N-Acetylglycine (1.469 g, 12.65 mmol), anhydrous sodium acetate (1.037 g, 12.65 mmol), 2,6-difluoro-4-hydroxybenzaldehyde (2.00 g, 12 mmol), and acetic anhydride (12 mL) were stirred at 120 °C for 4 h. After the reaction was cooled to room temperature, then the resulting crude solid was washed with a small amount of cold ethanol, hot water dried to afford the primary product which was recrystallized from ethanol, yielding a yellow solid of Compound 1 (2.44 g, yield 72%), without purification and characterization for the next step.

### 1.2 Synthesis of DFHBI-1T (Z)-4-(3,5-difluoro-4-hydroxybenzylidene)-2-methyl-1-(2,2,2-trifluoroethyl) -1H-imidazol-5(4H)-one

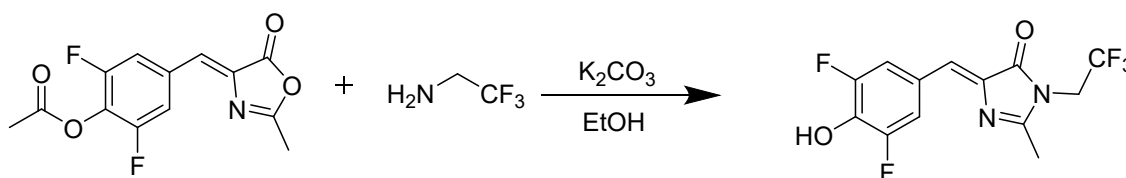

Compound 1 (500 mg, 1.78 mmol) was refluxed with 4.3 mL of absolute ethanol, (264.75 mg, 2.67 mmol) of 2,2,2-Trifluoroethylamine, and 370 mg of potassium carbonate for 4 h. The reaction mixture was cooled to room temperature. The solvent was evaporated and the mixture was redissolved in a 1:1 mixture of ethyl acetate and 500 mM sodium acetate at pH 3.0. The organic layer was separated and dried with

anhydrous sodium sulfate. The solvent was removed under reduced pressure and the reaction mixture was purified by column chromatography (CH<sub>2</sub>Cl<sub>2</sub>: EtOH = 10:1) to afford 142 mg (yield 25%) of DFHBI-1T as yellow solid. <sup>1</sup>H NMR (400 MHz, DMSO-d<sub>6</sub>) δ 11.06 (s, 1H), 7.99 (d, *J* = 8.7 Hz, 2H), 7.03 (s, 1H), 4.56 (q, *J* = 9.3 Hz, 2H), 2.41 (s, 3H).

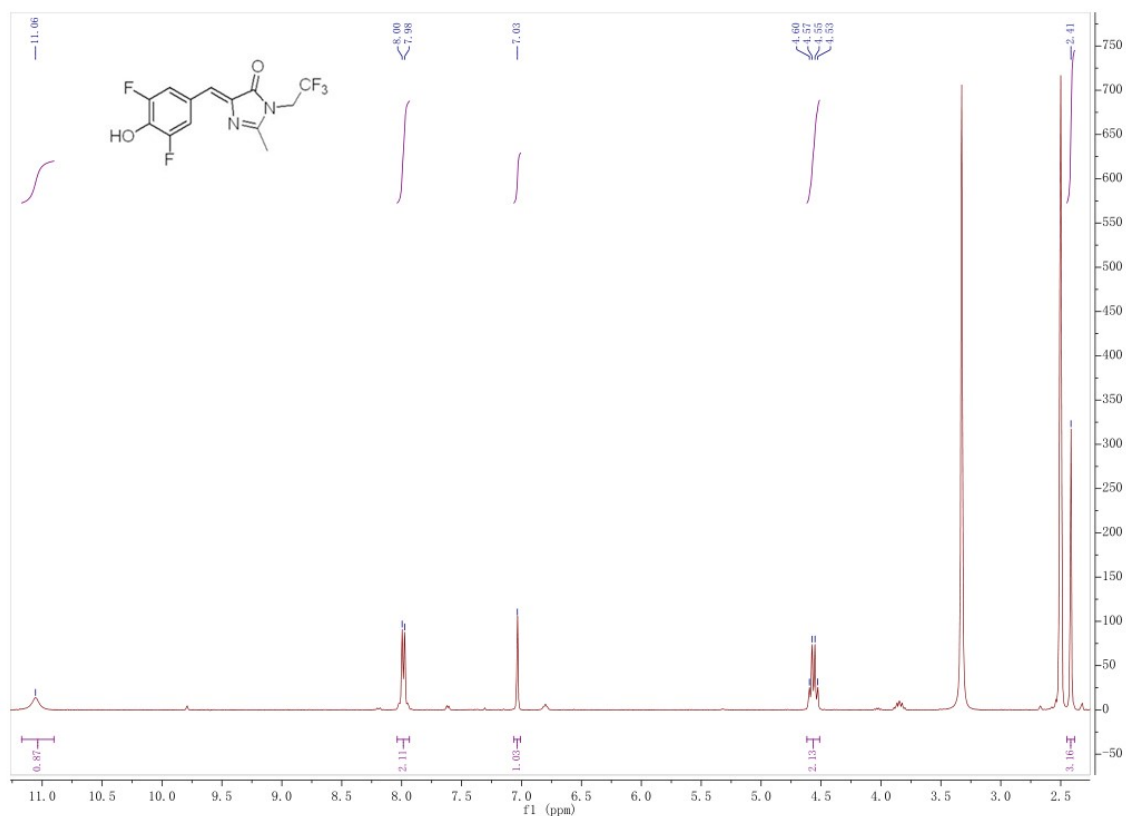

**Figure S1.** <sup>1</sup>H NMR spectrum of DFHBI-1T.

## 2. Supplemental Tables and Figures

### 2.1. Supplemental Tables.

**Table S1.** Sequences and secondary structures of DNA oligomers applied in this study\*.

| Oligonucleotide           | Sequence (5' - 3')                                          | Structure type |
|---------------------------|-------------------------------------------------------------|----------------|
| S2T3 <sub>AT</sub> -GC    | CTTAGTAGGGATGATGCGGCAGTGGGCTTCATCTAT<br>ATAAGATGAGGGGACTAAG | Single strand  |
| S2T3 <sub>AT</sub> -GC-M1 | CTTAGTAGCCATGATGCGGCAGTGGGCTTCATCTAT<br>ATAAGATGAGGGGACTAAG | Single strand  |
| S2T3 <sub>AT</sub> -GC-M2 | CTTAGTAGGGATGATGCGGCAGTGGGCTTCATCTAT<br>ATAAGATGACCCGACTAAG | Single strand  |
| P2-S2T4 <sub>AT</sub>     | TAGTAGGGATGATGCGGCAGTGGGCTTCATCTATAT<br>AAGATGAGGGGACTA     | Single strand  |
| ssDNA1                    | CCAGTTCGTAGTAACCC                                           | Single strand  |
| ssDNA2                    | GGGTTACTACGAACTGG                                           | Single strand  |
| ssDNA3                    | GAAAATGAGAGACTCAGCTAAGCAAGATAG                              | Single strand  |
| ssDNA4                    | GGGAATGAGGGACTCGGCTGGGCAGGATGG                              | Single strand  |
| ds26                      | CAATCGGATCGAATTCGATCCGATTG                                  | Duplex         |
| H-Telo                    | GGGTTAGGGTTAGGGTTAGGG                                       | G-quadruplex   |
| HT                        | TTGGGTTAGGGTTAGGGTTAGGGA                                    |                |
| Kras                      | AGGGCGGTGTGGGAAGAGGGAAGAGGGGGAGG                            |                |
| Hras                      | TCGGGTTGCGGGCGCAGGGCACGGGCG                                 |                |

\* dsDNA was obtained from the hybridization between ssDNA1 and ssDNA2.

**Table S2.** Detection performance of previously reported methods.

| Detection methods         | Detection linear range | Detection Limits | Reference |
|---------------------------|------------------------|------------------|-----------|
| Colormetric probe         | 1.8-200 $\mu$ M        | 1.8 $\mu$ M      | 1         |
| Reflectance chemosensor   | 0.78-160 $\mu$ M       | 0.612 $\mu$ M    | 2         |
| Spectrophotometric method | 2-400 $\mu$ M          | 0.556 $\mu$ M    | 3         |
| Colorimetric probe        | 10-45 $\mu$ M          | 0.56 $\mu$ M     | 4         |
| Nanosensor                | 0.5-80 $\mu$ M         | 0.5 $\mu$ M      | 5         |
| Fluorescent probe         | 8.75-20 $\mu$ M        | 6.7 $\mu$ M      | 6         |

**Table S3.** The ICP-OES for the real content of raw sewage-1.

| Element   | Coefficient of dilution | Values of instrument | Final content   | Concentration (mol/L)                   | Element | Coefficient of dilution | Values of instrument | Final content | Concentration (mol/L) |
|-----------|-------------------------|----------------------|-----------------|-----------------------------------------|---------|-------------------------|----------------------|---------------|-----------------------|
| Yb        | 1                       | 0.0001               | <0.05           | $5.78 \times 10^{-10}$                  | Hf      | 1                       | 0.0090               | <0.05         | $5.04 \times 10^{-8}$ |
| Ti        | 1                       | 0.0001               | <0.05           | $2.09 \times 10^{-9}$                   | Er      | 1                       | 0.0094               | <0.05         | $5.62 \times 10^{-8}$ |
| Sc        | 1                       | 0.0001               | <0.05           | $2.22 \times 10^{-9}$                   | Zr      | 1                       | 0.0110               | <0.05         | $1.21 \times 10^{-7}$ |
| Y         | 1                       | 0.0001               | <0.05           | $1.12 \times 10^{-9}$                   | Mo      | 1                       | 0.0114               | <0.05         | $1.19 \times 10^{-7}$ |
| Gd        | 1                       | 0.0003               | <0.05           | $1.91 \times 10^{-9}$                   | Ge      | 1                       | 0.0134               | <0.05         | $1.85 \times 10^{-7}$ |
| Ho        | 1                       | 0.0004               | <0.05           | $2.43 \times 10^{-9}$                   | Se      | 1                       | 0.0151               | <0.05         | $1.91 \times 10^{-7}$ |
| Cd        | 1                       | 0.0005               | <0.05           | $4.45 \times 10^{-9}$                   | Tl      | 1                       | 0.0160               | <0.05         | $7.83 \times 10^{-8}$ |
| La        | 1                       | 0.0007               | <0.05           | $5.04 \times 10^{-9}$                   | Mn      | 1                       | 0.0192               | <0.05         | $3.49 \times 10^{-7}$ |
| V         | 1                       | 0.0007               | <0.05           | $1.37 \times 10^{-8}$                   | Te      | 1                       | 0.0199               | <0.05         | $1.56 \times 10^{-7}$ |
| Pd        | 1                       | 0.0007               | <0.05           | $6.58 \times 10^{-9}$                   | As      | 1                       | 0.0223               | <0.05         | $2.98 \times 10^{-7}$ |
| Ga        | 1                       | 0.0008               | <0.05           | $1.15 \times 10^{-8}$                   | W       | 1                       | 0.0328               | <0.05         | $1.78 \times 10^{-7}$ |
| Be        | 1                       | 0.0008               | <0.05           | $8.88 \times 10^{-8}$                   | Ba      | 1                       | 0.0381               | <0.05         | $2.77 \times 10^{-8}$ |
| Nb        | 1                       | 0.0009               | <0.05           | $9.69 \times 10^{-9}$                   | Li      | 1                       | 0.0435               | <0.05         | $6.27 \times 10^{-6}$ |
| Co        | 1                       | 0.0009               | <0.05           | $1.53 \times 10^{-8}$                   | Al      | 1                       | 0.0443               | <0.05         | $1.64 \times 10^{-6}$ |
| <b>Cu</b> | <b>1</b>                | <b>0.0010</b>        | <b>&lt;0.05</b> | <b><math>1.57 \times 10^{-8}</math></b> | Rh      | 1                       | 0.0046               | <0.05         | $4.47 \times 10^{-8}$ |
| Zn        | 1                       | 0.0010               | <0.05           | $1.53 \times 10^{-8}$                   | Sn      | 1                       | 0.0060               | <0.05         | $5.06 \times 10^{-8}$ |
| Ag        | 1                       | 0.0011               | <0.05           | $1.01 \times 10^{-8}$                   | Pr      | 1                       | 0.0065               | <0.05         | $4.61 \times 10^{-8}$ |
| Pt        | 1                       | 0.0012               | <0.05           | $6.15 \times 10^{-9}$                   | Eu      | 1                       | 0.0072               | <0.05         | $4.74 \times 10^{-8}$ |
| Ir        | 1                       | 0.0012               | <0.05           | $6.24 \times 10^{-9}$                   | Ru      | 1                       | 0.0077               | <0.05         | $7.62 \times 10^{-8}$ |
| Tm        | 1                       | 0.0013               | <0.05           | $7.70 \times 10^{-9}$                   | Bi      | 1                       | 0.0078               | <0.05         | $3.73 \times 10^{-8}$ |
| Tb        | 1                       | 0.0016               | <0.05           | $1.01 \times 10^{-8}$                   | Lu      | 1                       | 0.0079               | <0.05         | $4.52 \times 10^{-8}$ |
| Ni        | 1                       | 0.0017               | <0.05           | $2.90 \times 10^{-8}$                   | Cr      | 1                       | 0.1016               | 0.1016        | $1.95 \times 10^{-6}$ |
| Ce        | 1                       | 0.0023               | <0.05           | $1.64 \times 10^{-8}$                   | P       | 1                       | 0.2022               | 0.2022        | $4.53 \times 10^{-6}$ |
| Dy        | 1                       | 0.0027               | <0.05           | $1.66 \times 10^{-8}$                   | Fe      | 1                       | 0.3149               | 0.3149        | $5.64 \times 10^{-6}$ |
| Ta        | 1                       | 0.0029               | <0.05           | $1.60 \times 10^{-8}$                   | Ca      | 100                     | 0.5635               | 56.35         | $1.41 \times 10^{-3}$ |
| Pb        | 1                       | 0.0031               | <0.05           | $1.50 \times 10^{-8}$                   | Sr      | 1                       | 0.7243               | 0.7243        | $8.27 \times 10^{-6}$ |
| Sm        | 1                       | 0.0034               | <0.05           | $2.26 \times 10^{-8}$                   | K       | 100                     | 0.9252               | 92.52         | $2.37 \times 10^{-3}$ |
| Au        | 1                       | 0.0034               | <0.05           | $1.73 \times 10^{-8}$                   | Si      | 1                       | 1.1488               | 1.1488        | $4.09 \times 10^{-5}$ |
| Sb        | 1                       | 0.0041               | <0.05           | $3.37 \times 10^{-8}$                   | B       | 1                       | 1.2901               | 1.2901        | $1.19 \times 10^{-4}$ |
| Hg        | 1                       | 0.0043               | <0.05           | $2.14 \times 10^{-8}$                   | Mg      | 1                       | 6.7872               | 6.7872        | $2.79 \times 10^{-4}$ |
| In        | 1                       | 0.0044               | <0.05           | $2.83 \times 10^{-8}$                   | Na      | 100                     | 19.942               | 1994.2        | $8.67 \times 10^{-2}$ |
| Nd        | 1                       | 0.0087               | <0.05           | $6.03 \times 10^{-8}$                   |         |                         |                      |               |                       |

**Table S4.** The ICP-OES for the real content of raw sewage-2.

| Element | coefficient of dilution | Values of instrument  | Final content | Concentration (mol/L)     | Element   | coefficient of dilution | Values of instrument | Final content | Concentration (mol/L)          |
|---------|-------------------------|-----------------------|---------------|---------------------------|-----------|-------------------------|----------------------|---------------|--------------------------------|
| Y       | 1                       | 5.6×10 <sup>-5</sup>  | <0.05         | 6.29376×10 <sup>-10</sup> | Ta        | 1                       | 0.009806             | <0.05         | 5.41947×10 <sup>-8</sup>       |
| Ti      | 1                       | 6.92×10 <sup>-5</sup> | <0.05         | 1.44526×10 <sup>-9</sup>  | Eu        | 1                       | 0.010937             | <0.05         | 7.19696×10 <sup>-8</sup>       |
| Sc      | 1                       | 0.000122              | <0.05         | 2.71477×10 <sup>-9</sup>  | Nd        | 1                       | 0.011418             | <0.05         | 7.91817×10 <sup>-8</sup>       |
| Yb      | 1                       | 0.000189              | <0.05         | 1.09276×10 <sup>-9</sup>  | Er        | 1                       | 0.013753             | <0.05         | 8.22548×10 <sup>-8</sup>       |
| V       | 1                       | 0.000284              | <0.05         | 5.56819×10 <sup>-9</sup>  | Pr        | 1                       | 0.015069             | <0.05         | 1.06937×10 <sup>-7</sup>       |
| Ho      | 1                       | 0.000309              | <0.05         | 1.87395×10 <sup>-9</sup>  | P         | 1                       | 0.018752             | <0.05         | 6.05404×10 <sup>-7</sup>       |
| Gd      | 1                       | 0.000822              | <0.05         | 5.22871×10 <sup>-9</sup>  | Tl        | 1                       | 0.019646             | <0.05         | 9.6162×10 <sup>-8</sup>        |
| Cd      | 1                       | 0.000979              | <0.05         | 8.70937×10 <sup>-9</sup>  | W         | 1                       | 0.02345              | <0.05         | 1.27582×10 <sup>-7</sup>       |
| La      | 1                       | 0.001056              | <0.05         | 7.59915×10 <sup>-9</sup>  | Mn        | 1                       | 0.024079             | <0.05         | 4.38294×10 <sup>-7</sup>       |
| Be      | 1                       | 0.001063              | <0.05         | 1.17967×10 <sup>-7</sup>  | Hf        | 1                       | 0.0274               | <0.05         | 1.53588×10 <sup>-7</sup>       |
| Ce      | 1                       | 0.001081              | <0.05         | 7.71539×10 <sup>-9</sup>  | In        | 1                       | 0.032751             | <0.05         | 2.8524×10 <sup>-7</sup>        |
| Tm      | 1                       | 0.001462              | <0.05         | 8.6519×10 <sup>-9</sup>   | Te        | 1                       | 0.032779             | <0.05         | 2.56885×10 <sup>-7</sup>       |
| Mo      | 1                       | 0.00147               | <0.05         | 1.53221×10 <sup>-8</sup>  | Hg        | 1                       | 0.005763             | <0.05         | 2.87443×10 <sup>-8</sup>       |
| Pb      | 1                       | 0.001535              | <0.05         | 7.40936×10 <sup>-9</sup>  | Ag        | 1                       | 0.006127             | <0.05         | 5.67991×10 <sup>-8</sup>       |
| Au      | 1                       | 0.001978              | <0.05         | 1.00416×10 <sup>-8</sup>  | Pt        | 1                       | 0.006174             | <0.05         | 3.1648×10 <sup>-8</sup>        |
| Rh      | 1                       | 0.002073              | <0.05         | 2.01428×10 <sup>-8</sup>  | Co        | 1                       | 0.006588             | <0.05         | 1.11787×10 <sup>-7</sup>       |
| Sn      | 1                       | 0.002245              | <0.05         | 1.89288×10 <sup>-8</sup>  | Ru        | 1                       | 0.008421             | <0.05         | 8.33184×10 <sup>-8</sup>       |
| Ir      | 1                       | 0.002446              | <0.05         | 1.27287×10 <sup>-8</sup>  | Ge        | 1                       | 0.008586             | <0.05         | 1.18433×10 <sup>-7</sup>       |
| Dy      | 1                       | 0.002479              | <0.05         | 1.52534×10 <sup>-8</sup>  | Bi        | 1                       | 0.008668             | <0.05         | 4.14771×10 <sup>-8</sup>       |
| Pd      | 1                       | 0.002536              | <0.05         | 1.56089×10 <sup>-8</sup>  | Al        | 1                       | 0.062041             | 0.062041      | 2.29934×10 <sup>-6</sup>       |
| Tb      | 1                       | 0.002551              | <0.05         | 1.60533×10 <sup>-8</sup>  | Ba        | 1                       | 0.06711              | 0.06711       | 4.88677×10 <sup>-7</sup>       |
| Zr      | 1                       | 0.002764              | <0.05         | 3.03028×10 <sup>-8</sup>  | Fe        | 1                       | 0.08713              | 0.08713       | 1.56035×10 <sup>-6</sup>       |
| As      | 1                       | 0.003056              | <0.05         | 4.07824×10 <sup>-8</sup>  | Li        | 1                       | 0.129932             | 0.129932      | 1.87195×10 <sup>-5</sup>       |
| Sm      | 1                       | 0.003179              | <0.05         | 2.11374×10 <sup>-8</sup>  | Sr        | 1                       | 0.752605             | 0.752605      | 8.58942×10 <sup>-6</sup>       |
| Cr      | 1                       | 0.003186              | <0.05         | 6.12736×10 <sup>-8</sup>  | Ca        | 100                     | 0.917754             | 91.7754       | 0.002289805                    |
| Zn      | 1                       | 0.003921              | <0.05         | 5.99722×10 <sup>-8</sup>  | K         | 100                     | 0.956576             | 95.6576       | 0.002446611                    |
| Se      | 1                       | 0.003974              | <0.05         | 5.03674×10 <sup>-8</sup>  | <b>Cu</b> | <b>1</b>                | <b>2.667</b>         | <b>2.667</b>  | <b>4.19736×10<sup>-5</sup></b> |
| Ga      | 1                       | 0.004449              | <0.05         | 6.38143×10 <sup>-8</sup>  | B         | 1                       | 7.09706              | 7.09706       | 0.000656467                    |
| Ni      | 1                       | 0.005086              | <0.05         | 8.66594×10 <sup>-8</sup>  | Si        | 1                       | 7.61469              | 7.61469       | 0.00027113                     |
| Lu      | 1                       | 0.005471              | <0.05         | 3.12703×10 <sup>-8</sup>  | Mg        | 1                       | 7.67772              | 7.67772       | 0.000315891                    |
| Nb      | 1                       | 0.006763              | <0.05         | 7.27988×10 <sup>-8</sup>  | Na        | 100                     | 20.6423              | 2064.23       | 0.089792074                    |
| Sb      | 1                       | 0.0349                | <0.05         | 2.86769×10 <sup>-7</sup>  |           |                         |                      |               |                                |

**Table S5.** The detection for Cu<sup>2+</sup> in raw sewage-2.

| Samples      | Theoretical value( $\mu\text{M}$ ) | Real value ( $\mu\text{M}$ ) | Recovery (%) | RSD (%) |
|--------------|------------------------------------|------------------------------|--------------|---------|
| Raw sewage-2 | 0.5                                | 0.49                         | 98.1         | 0.23    |
|              | 1.5                                | 1.48                         | 98.4         | 0.13    |
|              | 10                                 | 9.76                         | 97.6         | 0.89    |
|              | 20                                 | 19.64                        | 98.2         | 0.22    |
|              | 30                                 | 29.87                        | 99.6         | 0.12    |

## 2.2. Supplemental Figures.

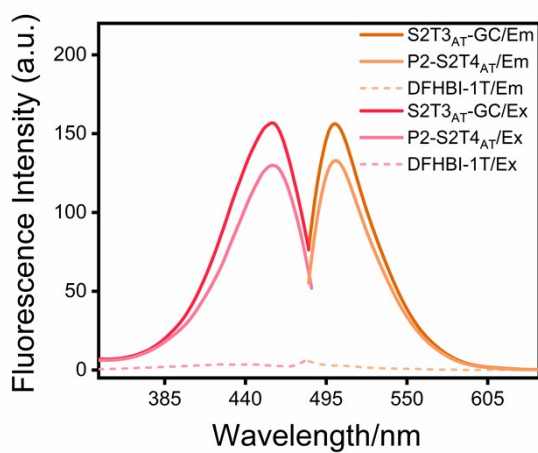

**Figure S2.** The fluorescence excitation and emission spectrum of 5  $\mu\text{L}$  DFHBI-1T (200  $\mu\text{M}$ ) with or without 4  $\mu\text{L}$  DNA oligomers (100  $\mu\text{M}$ ) that dissolved into the reaction buffer. The fluorescent intensity values ranging from 340 to 640 nm were recorded.



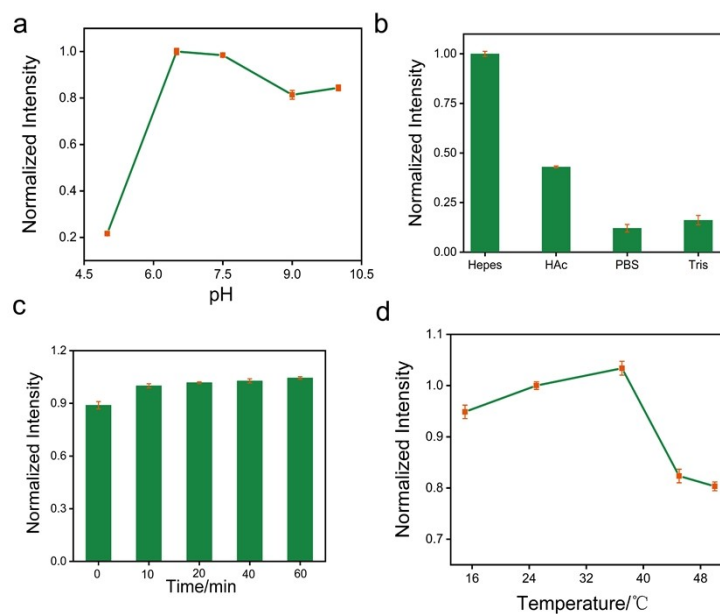

**Figure S3.** Fluorescence assays for optimizing the binding effect of S2T3<sub>AT</sub>-GC and DFHBI-1T. The fluorescence intensity of the mixture contained 4  $\mu$ L DNA oligomers (100  $\mu$ M) and 5  $\mu$ L DFHBI-1T (200  $\mu$ M) at 502 nm were measured by adjusting different conditions including pH, reaction buffer, incubation time and temperature.

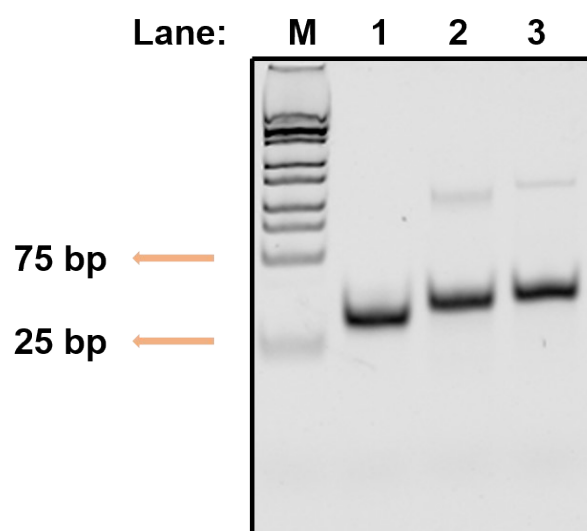

**Figure S4.** The PAGE analysis of DNA oligomers for 1 h, 90 V electrophoresis migration in 1 $\times$ TB buffer. Especially, Lane M: 25 bp Marker; Lane 1: S2T3<sub>AT</sub>-GC; Lane 2: S2T3<sub>AT</sub>-GC-M1; Lane 3: S2T3<sub>AT</sub>-GC-M2. All DNA oligomers are 1  $\mu$ M.

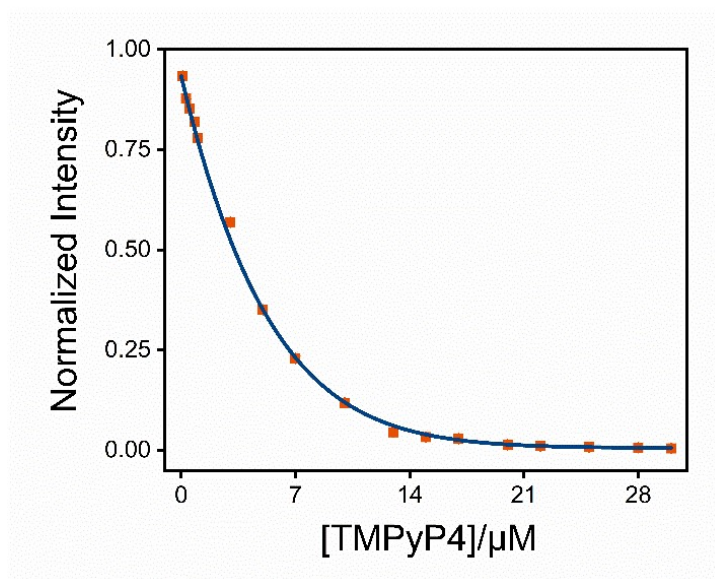

**Figure S5.** The fluorescence competition experiment between TMPyP4 and S2T3<sub>AT</sub>-GC/DFHBI-1T. Various concentrations of TMPyP4 (0.1-30 μM) were mixed with 4 μL DNA oligomers (100 μM) and 5 μL DFHBI-1T (200 μM).

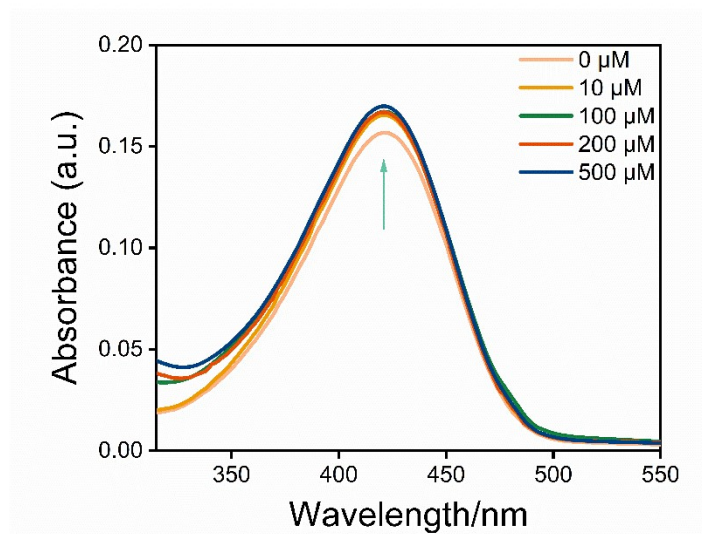

**Figure S6.** UV-vis spectra of DFHBI-1T/Cu (II). The UV-vis analysis of DFHBI-1T/Cu (II). 10 μL DFHBI-1T (200 μM) was mixed with different concentrations of Cu<sup>2+</sup>.

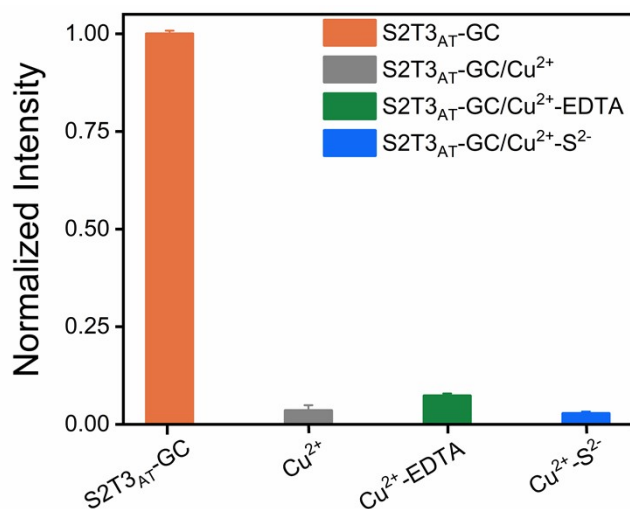

**Figure S7.** Fluorescence determination of S2T3<sub>AT</sub>-GC/DFHBI-1T with or without the mixture of 500  $\mu\text{M}$  Cu<sup>2+</sup> and 1000  $\mu\text{M}$  EDTA or the mixture of 500  $\mu\text{M}$  Cu<sup>2+</sup> and 1000  $\mu\text{M}$  Na<sub>2</sub>S.

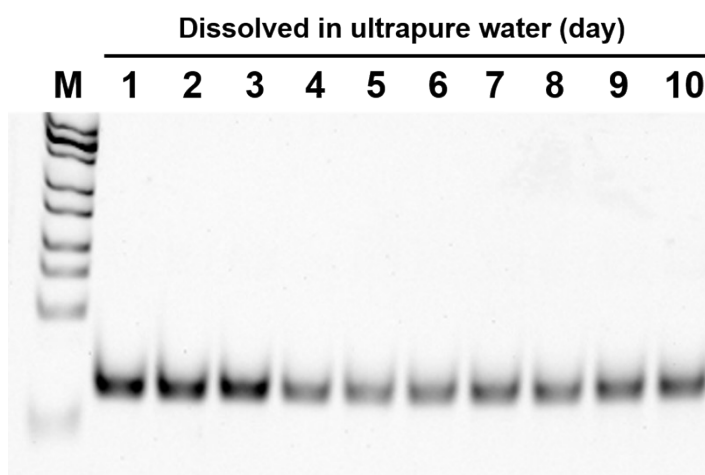

**Figure S8.** The PAGE analysis of S2T3<sub>AT</sub>-GC which dissolved in the ultrapure water for 10 days interval for 1 h, 90 V electrophoresis migration in 1 $\times$ TB buffer.

---

### 3. References

- (1) R. Wu, S. H. Zhang, J. T. Lyu, F. Lu, X. F. Yue and J. G. Lv, A visual volumetric hydrogel sensor enables quantitative and sensitive detection of copper ions, *Chem. Commun.*, 2015, **51**, 8078-8081.
- (2) N. H. A. Razak, L. L. Tan, S. A. Hasbullah and L. Y. Heng, Reflectance chemosensor based on bis-thiourea derivative as ionophore for copper(II) ion detection, *Microchem. J.*, 2020, **153**, 104460.
- (3) T. Wen, F. Qu, N. B. Li and H. Q. Luo, A nopinone based multi-functional probe for colorimetric detection of  $\text{Cu}^{2+}$  and ratiometric detection of  $\text{Ag}^+$ , *Arab. J. Chem.*, 2017, **10**, S1680-S1685.
- (4) Q. Jiang, Z. L. Wang, M. X. Li, J. Song, Y. Q. Yang, X. Xu, H. J. Xu and S. F. Wang, A nopinone based multi-functional probe for colorimetric detection of  $\text{Cu}^{2+}$  and ratiometric detection of Ag, *Photochem. Photobiol. Sci.*, 2020, **19**, 49-55.
- (5) T. P. Qing, H. C. Bu, X. X. He, D. G. He, B. Zhou, H. H. Sun, R. C. Jia, W. J. Ma and K. M. Wang, A selective nanosensor for ultrafast detection of  $\text{Cu}^{2+}$  ions based on C5 DNA-templated gold nanoclusters and Fenton-like reaction, *Analytical Methods*, 2017, **9**, 6222-6227.
- (6) M. Gao, C. C. Xing, X. P. Jiang, L. J. Xu, P. H. Li and C. D. Hsiao, Highly selective fluorescence detection of  $\text{Cu}^{2+}$  based on Schiff base functionalized periodic mesoporous organosilicas, *Luminescence*, 2021, **36**, 951-957.
